# Supplementary material for: Systemic lupus erythematosus and primary fibromyalgia can be distinguished by testing for cell-bound complement activation products
Source: HighWire-hosted journal article supplement (doi:10.1136/lupus-2015-000127), 2016-01-01
Supplement: lupus-2015-000127supp_tables.pdf [file lupus-2015-000127supp_tables.pdf]

**Supplemental Table I: ACR Criteria of subjects enrolled in the study.**

Results are expressed in counts and percentages.

|                                  | SLE (n=75) |
|----------------------------------|------------|
| <b>Malar Rash</b>                | 55 (73%)   |
| <b>Discoid Rash</b>              | 30 (40%)   |
| <b>Photosensitivity</b>          | 61 (81%)   |
| <b>Oral Ulcers</b>               | 38 (51%)   |
| <b>Non-erosive Arthritis</b>     | 73 (97%)   |
| <b>Pleuritis or Pericarditis</b> | 40 (53%)   |
| <b>Renal Disorder</b>            | 17 (23%)   |
| <b>Neurological Disorder</b>     | 1 (1%)     |
| <b>Hematological Disorder</b>    | 29 (39%)   |
| <b>Immunologic Disorder</b>      | 44 (59%)   |
| <b>Positive ANA</b>              | 74 (99%)   |

**Supplemental Table II: SLICC Criteria of subjects enrolled in the study.**

Results are expressed in counts and percentages.

|                                  | SLE (n=75) |
|----------------------------------|------------|
| <b>Acute Cutaneous</b>           | 57 (76%)   |
| <b>Chronic Cutaneous</b>         | 29 (39%)   |
| <b>Oral Ulcers</b>               | 37 (49%)   |
| <b>Nonscarring Alopecia</b>      | 35 (47%)   |
| <b>Synovitis</b>                 | 72 (96%)   |
| <b>Serositis</b>                 | 40 (53%)   |
| <b>Renal Disorder</b>            | 18 (24%)   |
| <b>Neurological Disorder</b>     | 1 (1%)     |
| <b>Hematological Disorder</b>    | 8 (11%)    |
| <b>Leukopenia</b>                | 22 (29%)   |
| <b>Thrombocytopenia</b>          | 8 (11%)    |
| <b>Positive ANA</b>              | 75 (100%)  |
| <b>Anti-dsDNA</b>                | 37 (49%)   |
| <b>Anti-Smith</b>                | 7 (9%)     |
| <b>Positive Antiphospholipid</b> | 12 (16%)   |
| <b>Low complement</b>            | 20 (27%)   |
| <b>Direct Coombs</b>             | 0 (0%)     |
| <b>Positive Biopsy</b>           | 14 (19%)   |

**Supplemental Table III: SELENA-SLEDAI Criteria of subjects enrolled in the study.**

Results are expressed in counts and percentages.

|                              | <b>SLE (n=75)</b> |
|------------------------------|-------------------|
| <b>Seizure</b>               | 0 (0%)            |
| <b>Psychosis</b>             | 0 (0%)            |
| <b>Brain</b>                 | 0 (0%)            |
| <b>Visual</b>                | 0 (0%)            |
| <b>Cranial</b>               | 0 (0%)            |
| <b>Headache</b>              | 0 (0%)            |
| <b>CVA</b>                   | 0 (0%)            |
| <b>Vasculitis</b>            | 0 (0%)            |
| <b>Arthritis</b>             | 60 (80%)          |
| <b>Myositis</b>              | 0 (0%)            |
| <b>Urinary_casts</b>         | 0 (0%)            |
| <b>Hematuria</b>             | 2 (3%)            |
| <b>Proteinuria</b>           | 4 (5%)            |
| <b>Pyuria</b>                | 1 (1%)            |
| <b>Rash</b>                  | 37 (49%)          |
| <b>Alopecia</b>              | 16 (21%)          |
| <b>Mucosal_ulcers</b>        | 7 (9%)            |
| <b>Pleurisy</b>              | 6 (8%)            |
| <b>Pericarditis</b>          | 0 (0%)            |
| <b>Low_complement</b>        | 18 (24%)          |
| <b>Increased_dna_binding</b> | 16 (21%)          |
| <b>Fever</b>                 | 1 (1%)            |
| <b>Thrombocytopenia</b>      | 1 (1%)            |
| <b>Leukopenia</b>            | 9 (12%)           |
